# PvD<sub>1</sub> defensin, a plant antimicrobial peptide with inhibitory activity against *Leishmania amazonensis*

Viviane V. do Nascimento\*<sup>1</sup>, Érica de O. Mello\*<sup>1</sup>, Laís P. Carvalho†, Edésio J.T. de Melo†, André de O. Carvalho\*, Katia V.S. Fernandes‡ and Valdirene M. Gomes\*<sup>2</sup>

\*Laboratório de Fisiologia e Bioquímica de Microrganismos, Centro de Biociências e Biotecnologia, Universidade Estadual do Norte Fluminense, Campos dos Goytacazes, Rio de Janeiro 28013-602, Brazil

†Laboratório de Biologia Celular e Tecidual, Centro de Biociências e Biotecnologia, Universidade Estadual do Norte Fluminense, Campos dos Goytacazes, Rio de Janeiro 28013-602, Brazil

‡Laboratório de Química e Função de Proteínas e Peptídeos, Centro de Biociências e Biotecnologia, Universidade Estadual do Norte Fluminense, Campos dos Goytacazes, Rio de Janeiro 28013-602, Brazil

## Synopsis

Plant defensins are small cysteine-rich peptides and exhibit antimicrobial activity against a variety of both plant and human pathogens. Despite the broad inhibitory activity that plant defensins exhibit against different micro-organisms, little is known about their activity against protozoa. In a previous study, we isolated a plant defensin named PvD<sub>1</sub> from *Phaseolus vulgaris* (cv. Pérola) seeds, which was seen to be deleterious against different yeast cells and filamentous fungi. It exerted its effects by causing an increase in the endogenous production of ROS (reactive oxygen species) and NO (nitric oxide), plasma membrane permeabilization and the inhibition of medium acidification. In the present study, we investigated whether PvD<sub>1</sub> could act against the protozoan *Leishmania amazonensis*. Our results show that, besides inhibiting the proliferation of *L. amazonensis* promastigotes, the PvD<sub>1</sub> defensin was able to cause cytoplasmic fragmentation, formation of multiple cytoplasmic vacuoles and membrane permeabilization in the cells of this organism. Furthermore, we show, for the first time, that PvD<sub>1</sub> defensin was located within the *L. amazonensis* cells, suggesting the existence of a possible intracellular target.

**Key words:** antimicrobial activity, *Leishmania amazonensis*, *Phaseolus vulgaris*, plant antimicrobial peptides, plant defensin.

Cite this article as: Bioscience Reports (2015) 35, e00248, doi:10.1042/BSR20150060

## INTRODUCTION

Leishmaniasis is an infectious disease that is prevalent worldwide, particularly in tropical and subtropical regions, killing thousands and debilitating millions of people each year. With 2 million new cases reported annually, infection by the *Leishmania* parasite represents an important global health problem for which there is no vaccine and few effective drugs [1].

The selection of an increasing number of antibiotic-resistant micro-organisms and other antimicrobial agents has attracted the attention of many researchers in an attempt to develop new therapeutic agents [2]. The therapeutic potential of AMPs (antimicrobial peptides) is enhanced owing to the ability of these

compounds to rapidly kill a large number of micro-organisms such as bacteria, viruses, fungi and parasites that are multidrug-resistant [3,4]. There is an increasing interest in the study of AMPs because of their capacity to interact with certain cellular membranes, and the resulting antimicrobial activity that they display against pathogens [5].

Promising AMPs include the plant-derived defensins, a family of basic peptides which consists of 45–54 amino acids, arranged in three-dimensional structures formed by three antiparallel  $\beta$ -strands and one  $\alpha$ -helix. This structure is stabilized by four disulfide bonds, which form a cysteine-stabilized  $\alpha$ -helix  $\beta$ -strands motif, commonly found in these peptides [5,6]. The antimicrobial activity of plant defensins is mainly observed

**Abbreviations:** AMP antimicrobial peptide; DIC, differential interference contrast.

<sup>1</sup> These authors contributed equally to this work.

<sup>2</sup> To whom correspondence should be addressed (email valmg@uenf.br).

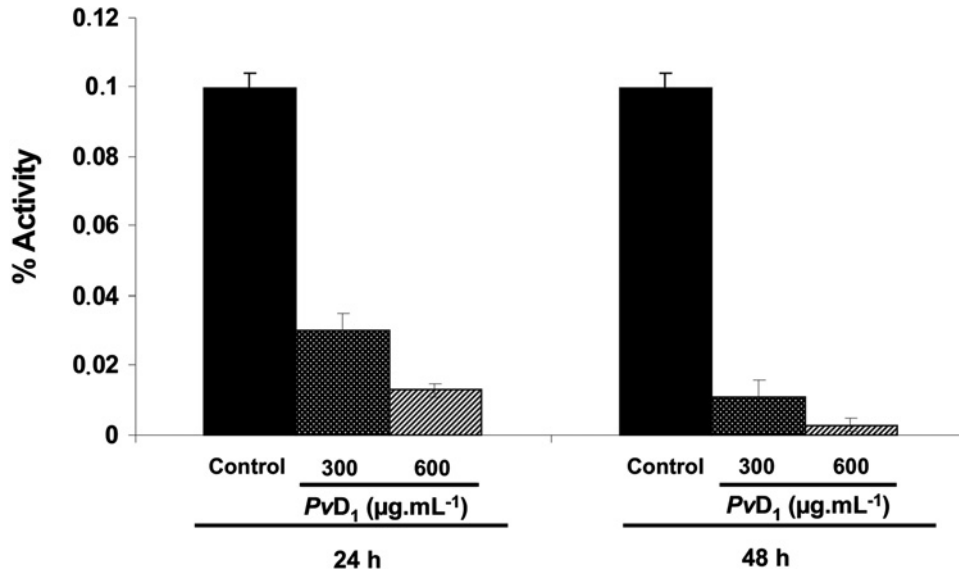

**Figure 1** Inhibition of the proliferation of *L. amazonensis* promastigotes in the presence of *PvD*<sub>1</sub>

Proliferation was observed for a 48 h period. The proliferation of *L. amazonensis* promastigote controls (without the addition of peptide) was also assessed. The experiments were performed in triplicate, and results are means  $\pm$  S.E.M.

against fungi. However, some bacteria, particularly Gram-positive species, are also inhibited, although the activity is less pronounced than that against fungi. The growth of several fungal species, including several filamentous fungi and yeast cells, was inhibited when incubated with these peptides [7–21]. Despite the broad inhibitory activity that plant defensins exhibit against different micro-organisms, scientists know little about their activity against protozoa.

In a previous study, we isolated a plant defensin named *PvD*<sub>1</sub> from *Phaseolus vulgaris* (cv. Pérola) seeds. This protein was able to negatively affect different yeast cells and filamentous fungi [22], causing an increase in the endogenous production of ROS (reactive oxygen species) and NO (nitric oxide), plasma membrane permeabilization and the inhibition of medium acidification [23]. In the present study, we investigated the action of *PvD*<sub>1</sub> against the protozoan *Leishmania amazonensis*. We were also interested to understand the mechanism by which *PvD*<sub>1</sub> affects *L. amazonensis* promastigotes.

## EXPERIMENTAL

### Biological material

*P. vulgaris* L. seeds were supplied by the Empresa de Pesquisa Agropecuária do Estado do Rio de Janeiro (Pesagro), Campos dos Goytacazes, Rio de Janeiro, Brazil.

Promastigote-stage *L. amazonensis* (Josefa strain) were supplied by Laboratório de Biologia Tecidual, Centro de Ciências e Biotecnologia, Universidade Estadual do Norte Fluminense

Darcy Ribeiro, Campos dos Goytacazes, Rio de Janeiro, Brazil. The protozoa were cultivated in 5 ml of Warren's medium [90% brain heart broth (Fluka) containing 10% (v/v) heat-inactivated FBS], enriched with 0.01% folic acid and 0.4% haemin at 28 °C. The protozoa were transferred to new medium every 3 days.

### Purification of the *P. vulgaris* defensin *PvD*<sub>1</sub>

The purification of the defensin from *P. vulgaris* (cv. Pérola) seeds was conducted as described by Games et al. [22].

### Gel electrophoresis

*PvD*<sub>1</sub> defensin purification was monitored by SDS/Tricine gel electrophoresis performed according to the method previously described by Schägger and Von Jagow [24].

### Cell proliferation assay

The effect of *PvD*<sub>1</sub> on the proliferation of *L. amazonensis* promastigotes was determined by incubating the parasites ( $1.5 \times 10^6$  parasites/ml) with the *PvD*<sub>1</sub> defensin (300 and 600  $\mu\text{g/ml}$ ) for 48 h at 28 °C in 200  $\mu\text{l}$  microplate wells. The peptide was diluted in DMSO (1.5% final concentration) and Warren's medium (100  $\mu\text{l}$ ) and incubated with the parasites in Warren's medium (100  $\mu\text{l}$ ). The proliferation of the parasites was monitored at 24 and 48 h by cell counting in Neubauer chamber. The proliferation of *L. amazonensis* promastigote controls (without the addition of peptides) was also assessed. The experiments were performed in triplicate, and S.E.M. were calculated.

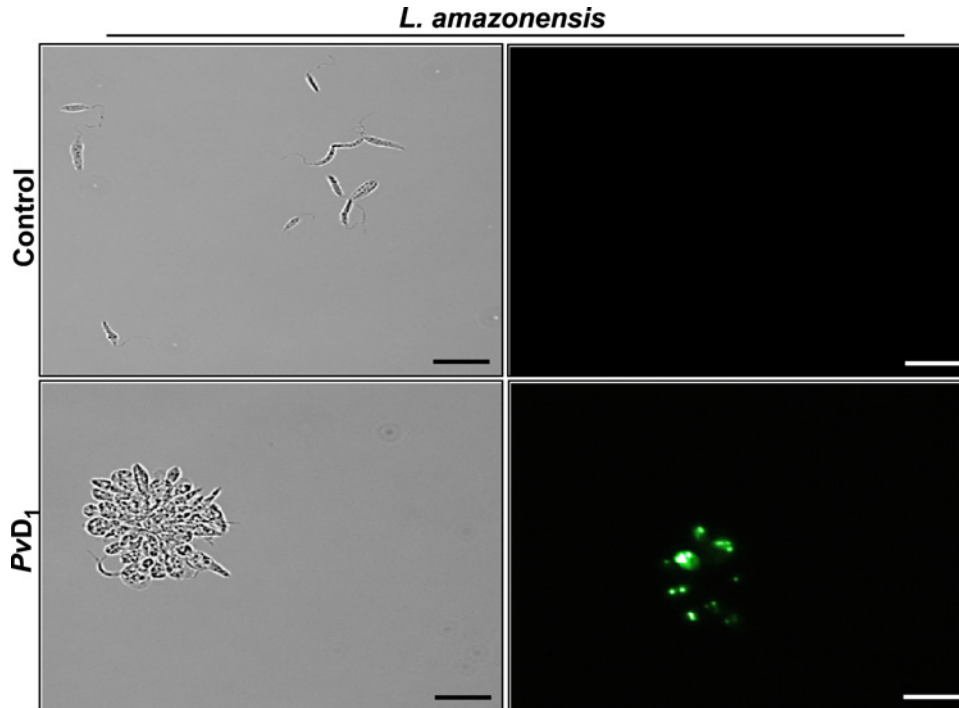

**Figure 2** Plasma membrane permeabilization assay

*L. amazonensis* promastigotes treated for 24 h with PvD<sub>1</sub> (300 µg/ml) and incubated with Sytox Green. The proliferation of *L. amazonensis* promastigote controls (without the addition of peptide) was also assessed. Scale bars, 20 µm.

### Plasma membrane permeabilization assay

Membrane permeabilization of *L. amazonensis* promastigotes was assessed by measuring Sytox Green uptake as described previously, with some modifications, by Thevissen et al. [25]. Sytox Green is a dye that only penetrates cells when the plasma membrane is structurally compromised. Once inside the parasitic cytoplasm, it binds to nucleic acids, resulting in a fluorescent complex. The *L. amazonensis* promastigotes ( $1.5 \times 10^6$  parasites/ml) were incubated with PvD<sub>1</sub> at a concentration of 300 µg/ml for 24 h at 28 °C in 200 µl microplate wells. Aliquots (100 µl) of the parasite cell suspension were incubated with 0.2 µM Sytox Green in 1.5 ml microcentrifuge tubes for 30 min at 25 °C with periodic agitation. After incubation, the parasites were fixed in 2% (w/v) paraformaldehyde. The cells were examined using a DIC (differential interference contrast) microscope (Axiophoto, Zeiss) equipped with a fluorescence filter set for the detection of fluorescein (excitation wavelengths, 450–490 nm; emission wavelength, 500 nm). Negative (no PvD<sub>1</sub> added) controls were also run to evaluate baseline membrane permeability.

### TEM (transmission electron microscopy)

For ultrastructural analyses, untreated or treated *L. amazonensis* promastigotes were washed with PBS at 37 °C and fixed at room temperature in a solution containing 1% (w/v) glutaraldehyde, 4% (w/v) paraformaldehyde, 5 mM CaCl<sub>2</sub> and 5% (w/v) sucrose in 0.1 M cacodylate buffer (pH 7.2). The cells were post-fixed

for 1 h in a solution containing 2% OsO<sub>4</sub>, 0.8% potassium ferrocyanide and 5 mM CaCl<sub>2</sub> in 0.1 M cacodylate buffer (pH 7.2), rinsed with 0.1 M cacodylate buffer (pH 7.2), dehydrated in acetone and embedded in PolyBed (Polysciences). Thin sections were stained with uranyl acetate and lead citrate and subsequently examined using a Zeiss 900 Transmission Electron Microscope at 80 kV acceleration.

### Intracellular localization of FITC-conjugated PvD<sub>1</sub>

PvD<sub>1</sub> was conjugated to FITC (Sigma), according to the manufacturer's instructions. The *L. amazonensis* promastigotes ( $1.5 \times 10^6$  parasites/ml) were incubated with PvD<sub>1</sub>-FITC at a concentration of 150 µg/ml for 24 h at 28 °C in 200 µl microplate wells. The cells were examined using a DIC microscope equipped with a fluorescence filter set for fluorescein detection (excitation wavelengths, 450–490 nm; emission wavelength, 500 nm).

## RESULTS

### Cell proliferation assay

The effect of PvD<sub>1</sub> on the proliferation of *L. amazonensis* promastigotes was evaluated. Figure 1 shows the inhibitory effects of PvD<sub>1</sub> (at concentrations of 300 and 600 µg/ml) towards the proliferation of parasites for periods of 24 h and 48 h. When compared with the control parasites grown in the absence of PvD<sub>1</sub>,

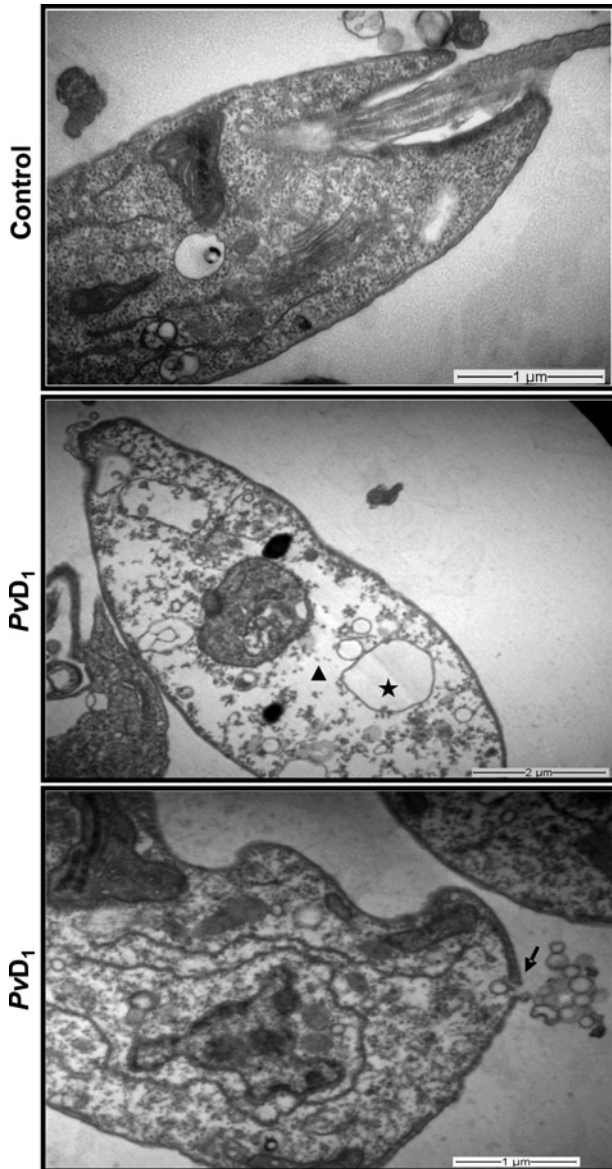

**Figure 3 Ultrastructural analysis of *L. amazonensis* promastigotes treated with PvD<sub>1</sub>**

*L. amazonensis* promastigotes treated for 24 h with PvD<sub>1</sub> (300 µg/ml). The star indicates vacuolization of the cytoplasm; the triangle indicates fragmentation of the cytoplasm; the arrow indicates disruption in the plasma membrane of promastigotes leading to loss of cytoplasmic material.

inhibitory rates of 70 and 89% were observed when testing PvD<sub>1</sub> at a concentration of 300 µg/ml at 24 h and 48 h respectively, whereas at a concentration of 600 µg/ml, inhibition rates of 87% and 96.5% were observed at 24 h and 48 h respectively.

#### Plasma membrane permeabilization assay

In order to investigate further the negative effects of PvD<sub>1</sub> on *L. amazonensis* promastigote proliferation, we analysed whether

cell membranes had been disrupted by the defensin. At 24 h of the proliferation inhibition assay, *L. amazonensis* promastigotes were treated with the fluorescent dye Sytox Green which only penetrates cells with structurally compromised plasma membranes. The observation of these cells by fluorescence microscopy showed that the *L. amazonensis* promastigotes were labelled by Sytox Green when treated with 300 µg/ml PvD<sub>1</sub> (Figure 2). In control cells, when parasites were grown in the absence of PvD<sub>1</sub>, no fluorescence was observed.

#### Ultrastructural analysis of *L. amazonensis* promastigotes treated with PvD<sub>1</sub>

To confirm the effect of PvD<sub>1</sub> defensin on membrane permeabilization of *L. amazonensis* promastigotes, these cells were analysed by TEM. The ultrastructure analysis of promastigotes treated with 300 µg/ml PvD<sub>1</sub> revealed that this defensin was able to cause plasma membrane disruption followed by leakage of cytoplasmic material. It also caused cytoplasmic fragmentation and vacuolization. In contrast, control cells exhibited membrane integrity and normal intracellular organization (Figure 3).

#### Intracellular localization of PvD<sub>1</sub>

In order to investigate further whether the PvD<sub>1</sub> defensin could be internalized in *L. amazonensis* promastigotes, its ability to penetrate and accumulate inside the cell was evaluated by coupling the peptide with FITC. After the *L. amazonensis* promastigote proliferation inhibition assay using 150 µg/ml PvD<sub>1</sub>-FITC, we observed the presence of PvD<sub>1</sub>-FITC in intracellular spaces of these cells (Figure 4), suggesting a possible intracellular target of PvD<sub>1</sub> in *L. amazonensis* promastigotes. In control cells, no fluorescence was observed.

## DISCUSSION

Plant defensins are capable of inhibiting the growth of a wide variety of filamentous fungi and yeast [5,6,23,22,26,27]. Despite the wide inhibitory activity that plant defensins have against different micro-organisms, there is a gap in our knowledge regarding the mechanism of action of plant defensins against protozoa. Only two studies to date show plant defensin activity against protozoan parasites of the genus *Leishmania* [28,29]. In the present study, we analysed the activity of a plant defensin, PvD<sub>1</sub>, against *L. amazonensis* promastigotes and characterized some aspects of this plant defensin's action against this parasite.

We observed that at 300 µg/ml, PvD<sub>1</sub> was able to inhibit 70% of the protozoan proliferation, after 24 h of incubation (Figure 1). Berrocal-Lobo et al. [30] observed the activity of a PTH1 defensin from *Solanum tuberosum* and a thionin from *Triticum aestivum* against *L. donovani*; however, these authors did not test these peptides against *L. amazonensis*. More recently, Souza et al. [29] showed that the natural defensin from *Vigna unguiculata* seeds (*Vu-Def*), as well as its recombinant homologues (*Vu-Defr*), both

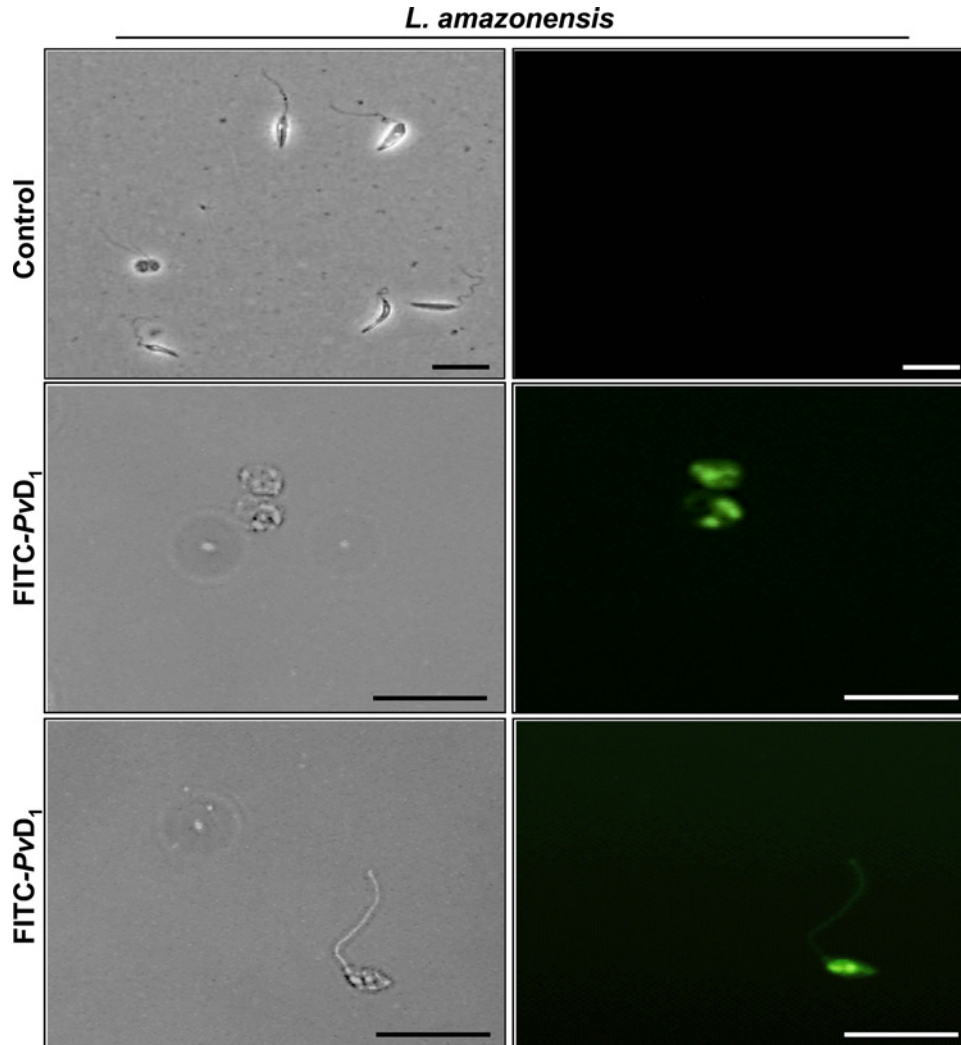

**Figure 4** Localization of FITC-conjugated  $PvD_1$

*L. amazonensis* promastigotes were treated for 24 h with FITC- $PvD_1$  (150  $\mu\text{g}/\text{ml}$ ). The *L. amazonensis* promastigote control (without the addition of FITC- $PvD_1$ ) was also assessed. Scale bars, 20  $\mu\text{m}$ .

at a concentration of 100  $\mu\text{g}/\text{ml}$ , were also able to inhibit the proliferation of the parasite *L. amazonensis* by approximately 50% after 48 h incubation. Nonetheless, it is still unknown whether the plant defensins would affect other species of protozoa with similar strength.

After treatment of *L. amazonensis* promastigotes with  $PvD_1$ , we used the Sytox Green fluorescent dye which binds to nucleic acids when the cell plasma membranes are structurally compromised. We observed that  $PvD_1$  was capable of causing damage to the plasma membrane (Figure 2), which was confirmed by the effects of  $PvD_1$  on membrane permeabilization, seen using TEM. Using ultrastructural analysis, we showed that the cells of protozoa treated with the defensin exhibited a disruption of the promastigote plasma membrane leading to the loss of cytoplasmic material as well as cytoplasmic fragmentation and formation of multiple cytoplasmic vacuoles (Figure 3). Bera et al.

[28] examined the effects of the AMP indolicidin (derived from bovine neutrophils) and two other peptides, 27RP and SPFK (derived from bovine seminal plasma), on *Leishmania donovani*. Interestingly, cells treated with these peptides exhibited extensive degeneration of intracellular organization and the formation of multiple cytoplasmic vacuoles without disruption of the plasma membrane. In contrast with the effect caused by AMPs, cells treated with amphotericin B exhibited no vacuolarization, although amphotericin B causes significant disruption of the plasma membrane. In the present study, we found both effects for  $PvD_1$ , which is the first reported plant AMP capable of causing cytoplasm fragmentation, formation of multiple cytoplasmic vacuoles and plasma membrane disruption of *L. amazonensis* promastigotes.

After this primary membrane-permeabilizing event, we analysed whether  $PvD_1$  was able to internalize *L. amazonensis*

promastigotes. For this, FITC-tagged PvD<sub>1</sub> was observed by fluorescence microscopy (Figure 4). The present study is the first to show that a plant defensin was able to enter *L. amazonensis* cells. On the basis of these data, we suggest the existence of a possible intracellular target for this defensin as a part of the mechanism responsible for leading to the protozoan's death.

In the present paper, we report the activity of a plant defensin against *L. amazonensis* and provide information on its mechanism of action. We demonstrate that, in addition to inhibiting the proliferation of *L. amazonensis* promastigotes, the PvD<sub>1</sub> defensin was able to cause cytoplasmic fragmentation, formation of multiple cytoplasmic vacuoles and membrane permeabilization in these cells. Furthermore, we show for the first time that PvD<sub>1</sub> defensin located within these cells may be acting on a possible intracellular target. These results open new perspectives regarding the antimicrobial mechanism of plant defensins as it suggests that the toxicity of these peptides may not be restricted to the plasma membrane.

#### AUTHOR CONTRIBUTION

The study was conceived by Valdirene M. Gomes and Edésio J.T. de Melo. Experimental procedures were carried out by Érica de O. Mello, Viviane V. do Nascimento and Laís P. Carvalho. Data analyses were performed by Érica de O. Mello, Viviane V. do Nascimento, Laís P. Carvalho, André de O. Carvalho, Valdirene M. Gomes and Edésio J.T. de Melo. The paper was written by Érica de O. Mello, Viviane V. do Nascimento, André de O. Carvalho, Katia V.S. Fernandes and Valdirene M. Gomes.

#### ACKNOWLEDGMENTS

This study comprises part of the postdoctoral research of Dr Viviane Veiga do Nascimento and part of the D.Sc. degree thesis of Erica O. Mello. This work was performed at the Universidade Estadual do Norte Fluminense Darcy Ribeiro. We are grateful to L.C.D. Souza and Kokis V.M. for general laboratory technical support.

#### FUNDING

We acknowledge the financial support of the Brazilian agencies Programa Nacional de Pós Doutorado (PNPD)/Coordenação de Aperfeiçoamento de Pessoal de Nível Superior (CAPES), CAPES/Toxinology, Conselho Nacional de Desenvolvimento Científico e Tecnológico (CNPq) and Fundação de Amparo à Pesquisa do Estado do Rio de Janeiro (FAPERJ).

## REFERENCES

- 1 Peacock, C.S., Seeger, K., Harris, D., Murphy, L., Ruiz, J.C., Quail, M.A., Peters, N., Adlem, E., Tivey, A., Aslett, M. et al. (2007) Comparative genomic analysis of three *Leishmania* species that cause diverse human disease. *Nat. Genet.* **39**, 839–847 [CrossRef PubMed](#)
- 2 Gallo, R.L., Murakami, M., Ohtake, T. and Zaiou, M. (2002) Biology and clinical relevance of naturally occurring antimicrobial peptides. *J. Allergy Clin. Immunol.* **110**, 823–831 [CrossRef PubMed](#)
- 3 Guan-Guerra, E., Santos-Mendoza, T., Lugo-Reyes, S.O. and Terán, L.M. (2010) Antimicrobial peptides: general overview and clinical implications in human health and disease. *Clin. Immunol.* **135**, 1–11 [CrossRef PubMed](#)
- 4 Teixeira, V., Feio, M.J. and Bastos, M. (2012) Role of lipids in the interaction of antimicrobial peptides with membranes. *Prog. Lipid Res.* **51**, 149–177 [CrossRef PubMed](#)
- 5 Carvalho, A.O. and Gomes, V.M. (2011) Plant defensins and defensin-like peptides: biological activities and biotechnological applications. *Curr. Pharm. Des.* **17**, 4270–4293 [CrossRef PubMed](#)
- 6 Carvalho, A.O. and Gomes, V.M. (2009) Plant defensins: prospects for the biological functions and biotechnological properties. *Peptides* **30**, 1007–1020 [CrossRef PubMed](#)
- 7 Anaya-López, J.L., López-Meza, J.E., Baizabal-Aguirre, V.M., Cano-Camacho, H. and Ochoa-Zarzosa, A. (2006) Fungicidal and cytotoxic activity of a *Capsicum chinense* defensin expressed by endothelial cells. *Biotechnol. Lett.* **28**, 1101–1108 [CrossRef PubMed](#)
- 8 Chen, G.-H., Hsu, M.-P., Tan, C.-H., Sung, H.-Y., Kuo, C.G., Fan, M.-J., Chen, H.-M., Chen, S. and Chen, C.-S. (2005) Cloning and characterization of a plant defensin VaD1 from azuki bean. *J. Agric. Food Chem.* **53**, 982–988 [CrossRef PubMed](#)
- 9 Finkina, E.I., Shramova, E.I., Tagaev, A.A. and Ovchinnikova, T.V. (2008) A novel defensin from the lentil *Lens culinaris* seeds. *Biochem. Biophys. Res. Commun.* **371**, 860–865 [CrossRef PubMed](#)
- 10 Odintsova, T.I., Rogozhin, E.A., Baranov, Y., Musolyamov, A.K., Nasser, Y., Egorov, T.A. and Grishin, E.V. (2008) Seed defensins of barnyard grass *Echinochloa crusgalli* (L.) Beauv. *Biochimie* **90**, 1667–1673 [CrossRef PubMed](#)
- 11 Olli, S. and Kirti, P.B. (2006) Cloning, characterization and antifungal activity of defensin Tfgd1 from *Trigonella foenum-graecum* L. *J. Biochem. Mol. Biol.* **39**, 278–283 [CrossRef PubMed](#)
- 12 Osborn, R.W., De Samblanx, G.W., Thevissen, K., Goderis, I., Torrekens, S., Van Leuven, F., Attenborough, S., Rees, S.B. and Broekaert, W.F. (1995) Isolation and characterisation of plant defensins from seeds of Asteraceae, Fabaceae, Hippocastanaceae and Saxifragaceae. *FEBS Lett.* **368**, 257–262 [CrossRef PubMed](#)
- 13 Solis, J., Medrano, G. and Ghislain, M. (2007) Inhibitory effect of a defensin gene from the Andean crop maca (*Lepidium meyenii*) against *Phytophthora infestans*. *J. Plant Physiol.* **164**, 1071–1082 [CrossRef PubMed](#)
- 14 Terras, F.R.G., Torrekens, S., Van Leuven, F., Osborn, R.W., Vanderleyden, J., Cammue, B.P.A. and Broekaert, W.F. (1993) A new family of basic cysteine-rich plant antifungal proteins from Brassicaceae species. *FEBS Lett.* **316**, 233–240 [CrossRef PubMed](#)
- 15 Thevissen, K., Ferket, K.K.A., François, I.E.J.A. and Cammue, B.P.A. (2003) Interactions of antifungal plant defensins with fungal membrane components. *Peptides* **24**, 1705–1712 [CrossRef PubMed](#)
- 16 Thevissen, K., François, I.E.J.A., Takemoto, J.Y., Ferket, K.K.A., Meert, E.M.K. and Cammue, B.P.A. (2003) DmAMP1, an antifungal plant defensin from dahlia (*Dahlia merckii*), interacts with sphingolipids from *Saccharomyces cerevisiae*. *FEMS Microbiol. Lett.* **226**, 169–173 [CrossRef PubMed](#)
- 17 Wang, H.X. and Ng, T.B. (2006) An antifungal peptide from baby lima bean. *Appl. Microbiol. Biotechnol.* **73**, 576–581 [CrossRef PubMed](#)
- 18 Wisniewski, M.E., Bassett, C.L., Artlip, T.S., Webb, R.P., Janisiewicz, W.J., Norelli, J.L., Goldway, M. and Drobny, S. (2003) Characterization of a defensin in bark and fruit tissues of peach and antimicrobial activity of a recombinant defensin in the yeast, *Pichia pastoris*. *Physiol. Plant.* **119**, 563–572 [CrossRef](#)

- 19 Wong, J.H. and Ng, T.B. (2005) Sesquin, a potent defensin-like antimicrobial peptide from ground beans with inhibitory activities toward tumor cells and HIV-1 reverse transcriptase. *Peptides* **26**, 1120–1126 [CrossRef PubMed](#)
- 20 Wong, J.H. and Ng, T.B. (2005) Vulgarinin, a broad-spectrum antifungal peptide from haricot beans (*Phaseolus vulgaris*). *Int. J. Biochem. Cell Biol.* **37**, 1626–1632 [CrossRef PubMed](#)
- 21 Ye, X.Y. and Ng, T.B. (2002) A new antifungal peptide from rice beans. *J. Pept. Res.* **60**, 81–87 [CrossRef PubMed](#)
- 22 Games, P.D., Santos, I.S., Mello, E.O., Diz, M.S.S., Carvalho, A.O., Souza-Filho, G.A., Da Cunha, M., Vasconcelos, I.M., Ferreira, B.S. and Gomes, V.M. (2008) Isolation, characterization and cloning of a cDNA encoding a new antifungal defensin from *Phaseolus vulgaris* L. seeds. *Peptides* **29**, 2090–2100 [CrossRef PubMed](#)
- 23 Mello, E.O., Ribeiro, S.F.F., Carvalho, A.O., Da Cunha, M., Santa-Catarina, C. and Gomes, V.M. (2011) Antifungal activity of PvD1 defensin involves plasma membrane permeabilization, inhibition of medium acidification and induction of ROS in fungi cells. *Curr. Microbiol.* **62**, 1209–1217 [CrossRef PubMed](#)
- 24 Schägger, H. and Von Jagow, G. (1987) Tricine-sodium dodecylsulfate polyacrylamide gel electrophoresis for the separation of proteins in the range from 1 to 100 kDa. *Anal. Biochem.* **166**, 368–379 [CrossRef PubMed](#)
- 25 Thevissen, K., Terras, F.R.G. and Broekaert, W.F. (1999) Permeabilization of fungal membranes by plant defensins inhibits fungal growth. *Appl. Environ. Microbiol.* **65**, 5451–5458 [PubMed](#)
- 26 Broekaert, W.F., Cammue, B.P.A., De Bolle, M.F.C., Thevissen, K., De Samblanx, G. and Osborn, R.W. (1997) Antimicrobial peptides from plants. *Crit. Rev. Plant Sci.* **16**, 297–323 [CrossRef](#)
- 27 Thevissen, K., de Mello Tavares, P., Xu, D., Blankenship, J., Vandenbosch, D., Idkowiak-Baldys, J., Govaert, G., Bink, A., Rozental, S., de Groot, P.W. et al. (2012) The plant defensin RsAFP2 induces cell wall stress, septin mislocalization and accumulation of ceramides in *Candida albicans*. *Mol. Microbiol.* **84**, 166–180 [CrossRef PubMed](#)
- 28 Bera, A., Singh, S., Nagaraj, R. and Vaidya, T. (2003) Induction of autophagic cell death in *Leishmania donovani* by antimicrobial peptides. *Mol. Biochem. Parasitol.* **127**, 23–35 [CrossRef PubMed](#)
- 29 Souza, G.S., Nascimento, V.V., Carvalho, L.P., Melo, E.J.T., Fernandes, K.V., Machado, O.L.T., Retamal, C.A., Gomes, V.M. and Carvalho, A.O. (2013) Activity of recombinant and natural defensins from *Vigna unguiculata* seeds against *Leishmania amazonensis*. *Exp. Parasitol.* **135**, 116–125 [CrossRef PubMed](#)
- 30 Berrocal-Lobo, M., Molina, A., Rodriguez-Palenzuela, P., Garcia-Olmeda, F. and Rivas, L. (2009) *Leishmania donovani*: thionins, plant antimicrobial peptides with leishmanicidal activity. *Exp. Parasitol.* **122**, 247–249 [CrossRef PubMed](#)

---

Received 5 March 2015/15 July 2015; accepted 31 July 2015

Accepted Manuscript online 18 August 2015, doi 10.1042/BSR20150060

---
